# Supplementary material for: Chiral recognition of α-phenylethylamine by sucrose-based macrocyclic receptors
Source: Royal Society of Chemistry journal article supplement (doi:10.1039/b816476b), 2008-01-01
Supplement: b816476b.pdf [file b816476b.pdf]

Synthesis of compound **7**:

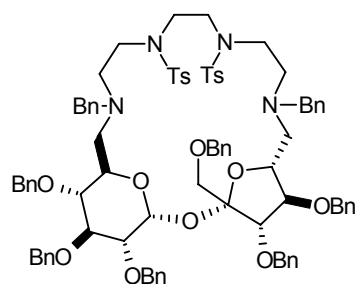

Diamine **5** (180mg, 0.17 mmole) was dissolved in acetonitrile (10mL). Sodium carbonate (300mg) and the ditosylate of N,N'-ditosyl-N,N'-diethanol-ethylenediamine (155mg, 0.20 mmole) were added and the mixture was refluxed for 48h. Then ethyl acetate (20mL) and water (10mL) were added. The aqueous layer was extracted with ethyl acetate (2 x 20mL), dried over magnesium sulfate and evaporated. The mixture was separated by column chromatography using hexane : ethyl acetate = 3:2 as eluent. The macrocycle **7** was obtained as yellowish oil (130mg, 51% yield).

Data for **7**:

MS m/z: 1481.6 [ C<sub>88</sub>H<sub>96</sub>N<sub>4</sub>O<sub>13</sub>S<sub>2</sub> + H<sup>+</sup> ] 1503.6 [ C<sub>88</sub>H<sub>96</sub>N<sub>4</sub>O<sub>13</sub>S<sub>2</sub> + Na<sup>+</sup> ].

<sup>1</sup>H NMR δ: 7.63 (d, 4H, J<sub>1,2</sub> = 8.27 Hz, H<sub>ortho</sub> – tosyl groups); 7.56 (d, 4H, J<sub>1,2</sub> = 8.27 Hz, H<sub>meta</sub> – tosyl groups); 7.18 – 7.28 (m, 40H, H<sub>Ar</sub>); 5.23 (d, 1H, J<sub>1,2</sub> = 3.22 Hz, H-1); 2.75-4.85 (range of multiplets, aliphatic hydrogens of the sucrose skeleton and the macrocyclic ring); 2.40 (s, 3H, CH<sub>3</sub> of tosyl group); 2.37 (s, 3H, CH<sub>3</sub> of tosyl group).

<sup>13</sup>C NMR δ: 143.2, 143.1 (C<sub>quat</sub>, tosyl groups); 138.80, 138.77, 138.5, 138.4, 138.3, 138.0, 137.93, 137.90 (C<sub>quat</sub>, benzyl groups); 136.2, 135.6 (C<sub>quat</sub>, tosyl groups); 127.0 – 129.7 (C<sub>Ar</sub>); 104.0 (C-2'); 90.0 (C-1); 83.2, 82.5, 82.2, 79.8, 78.1, 77.2, 71.6 (C-2, C-3, C-3', C-4, C-4', C-5, C-5'); 75.6, 74.1, 73.3, 73.2, 72.4, 72.1, 71.8 (6 x OCH<sub>2</sub>Ph, C-1'); 61.3, 57.8, 56.3, 55.1, 54.0, 53.8, 49.0, 48.8, 48.6, 47.6 (2 x NCH<sub>2</sub>Ph, C-6, C-6', 3 x (NCH<sub>2</sub>CH<sub>2</sub>N)); 21.49, 21.45 (CH<sub>3</sub>, tosyl groups).

Elem. analysis calcd. for C<sub>88</sub>H<sub>96</sub>N<sub>4</sub>O<sub>13</sub>S<sub>2</sub> : C = 71.33%, H = 6.53%, N = 3.78%, S = 4.33%;  
found: C = 71.07%, H = 6.82%, N = 3.42%, S = 4.30%.

Synthesis of compound **8**:

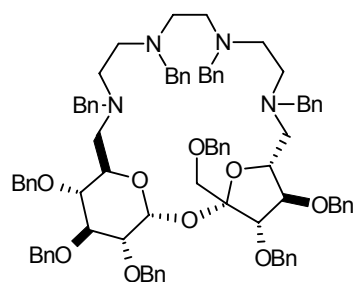

Dimesylate **6** (110mg, 0.084 mmole) was dissolved in acetonitrile (8mL). Sodium carbonate (250mg) and *N,N'*-dibenzylethylenediamine (24mg, 0.1 mmole) were added and the mixture was refluxed for 48h. Then ethyl acetate (15mL) and water (5mL) were added. The aqueous layer was extracted with ethyl acetate (2 x 15mL), dried over magnesium sulfate and evaporated. The mixture was separated by column chromatography using hexane : ethyl acetate = 3:2 as eluent. The macrocycle **8** was obtained as colourless oil (60mg, 53% yield).

Data for **8**:

MS *m/z*: 1353.8 [ $C_{88}H_{96}N_4O_9 + H^+$ ].

$^1H$  NMR  $\delta$ : 7.15 – 7.28 (m, 50H, HAR); 5.61 (d, 1H,  $J_{1,2} = 3.47$  Hz, H-1); 2.53 – 4.90 (range of multiplets, aliphatic hydrogens of the sucrose skeleton and the macrocyclic ring).

$^{13}C$  NMR: 139.7 (double intensity), 139.5, 139.4, 139.2, 139.0, 138.8, 138.41, 138.34, 138.26, 138.2 ( $C_{quat}$ , benzyl groups); 126.6 – 129.1 ( $C_{Ar}$ ); 104.6 (C-2'); 89.7 (C-1); 83.74, 83.68, 82.2, 81.5, 80.1, 79.0, 72.1 (C-2, C-3, C-3', C-4, C-4', C-5, C-5'); 76.2, 75.5, 75.0, 74.0, 73.4, 73.2, 72.4 (6 x  $OCH_2Ph$ , C-1'); 61.7, 60.4, 59.9, 59.0, 58.3, 58.2, 56.1, 53.5, 53.0, 52.6, 52.4, 52.2 (4 x  $NCH_2Ph$ , C-6, C-1', C-6', 3 x ( $NCH_2CH_2N$ )).

**Titration experiments (general procedure):**

A solution of the macrocycle in 0.6mL of the respective solvent ( $\text{CDCl}_3$  for the experiments with phenylethylammonium chlorides; acetone- $\text{d}_6$  for ammonium thiocyanate) was prepared (concentration given separately for each experiment). The NMR spectrum was recorded. Subsequently small portions of the guest were added to the solution. After each addition of the ammonium salt NMR spectra's were recorded. The shift of the signal of anomeric proton of sucrose was followed. The additions of guest were continued until the constant value of the chemical shift of H-1 (anomeric). The value of the signal shift was then plotted against the concentration of the guest in solution. A curve was fitted to the plot, using the empirical equation described by Fielding (ref.18 of the article).

This allowed to determine the value of the association constant for the interaction between the macrocycle and the guest molecule. The above mentioned operations were carried out using the MicroCal Origin software.

This methodology can be used for 1:1 complexes. If the method is applied successfully (the error of the  $K_a$  determination is not very high) the stoichiometry of the complex does not have to be additionally proven by preparation of the Job plot. In the case of compound **4** the error of  $K_a$  value was quite high so we have additionally prepared the Job plot. It has proven the 1:1 stoichiometry of the complex with S(-) phenylethylammonium chloride (see below).

### Compound 7:

Complexation of  $\text{NH}_4\text{SCN}$  (acetone- $d_6$ ). Concentration of 7 in acetone,  $C_7 = 0.0338$  M/L.

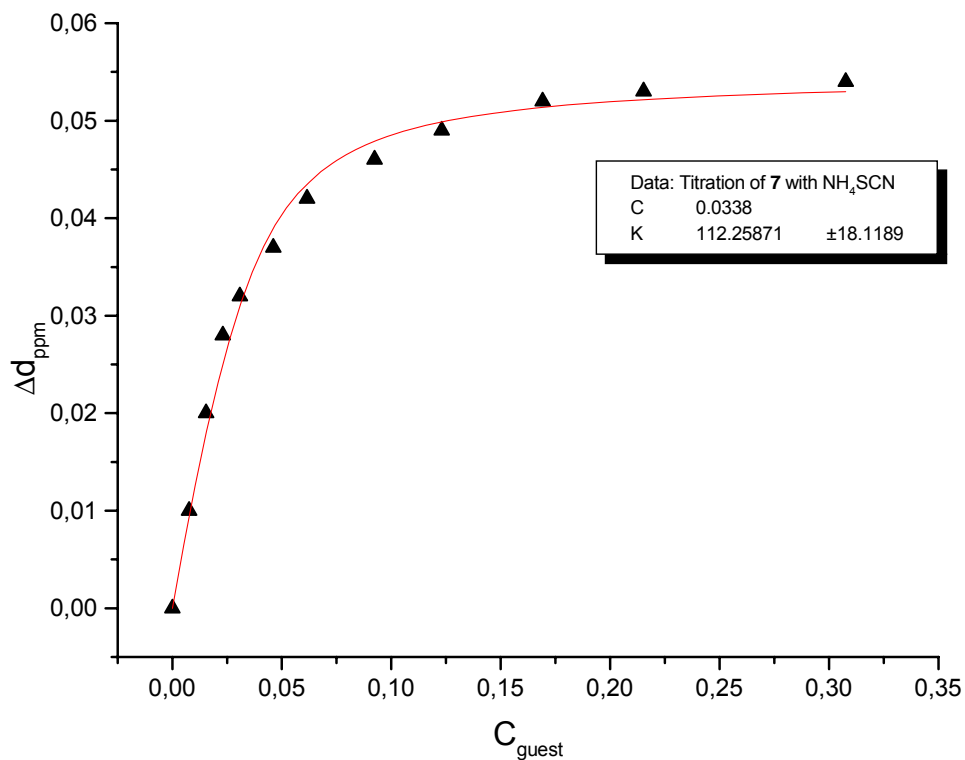

| Concentration of $\text{NH}_4\text{SCN}$<br>(M/L) | $\Delta d_{\text{ppm}}$ |
|---------------------------------------------------|-------------------------|
| 0                                                 | 0                       |
| 0.00769                                           | 0.01                    |
| 0.01538                                           | 0.02                    |
| 0.02308                                           | 0.028                   |
| 0.03077                                           | 0.032                   |
| 0.04615                                           | 0.037                   |
| 0.06153                                           | 0.042                   |
| 0.0923                                            | 0.046                   |
| 0.1231                                            | 0.049                   |
| 0.1692                                            | 0.052                   |
| 0.2153                                            | 0.053                   |
| 0.3077                                            | 0.054                   |

$$K_a = 112 \pm 18 \text{ M/L}$$

### Compound 8:

Complexation of  $\text{NH}_4\text{SCN}$  (acetone- $\text{d}_6$ ). Concentration of **8** in acetone,  $C_8 = 0.0296 \text{ M/L}$ .

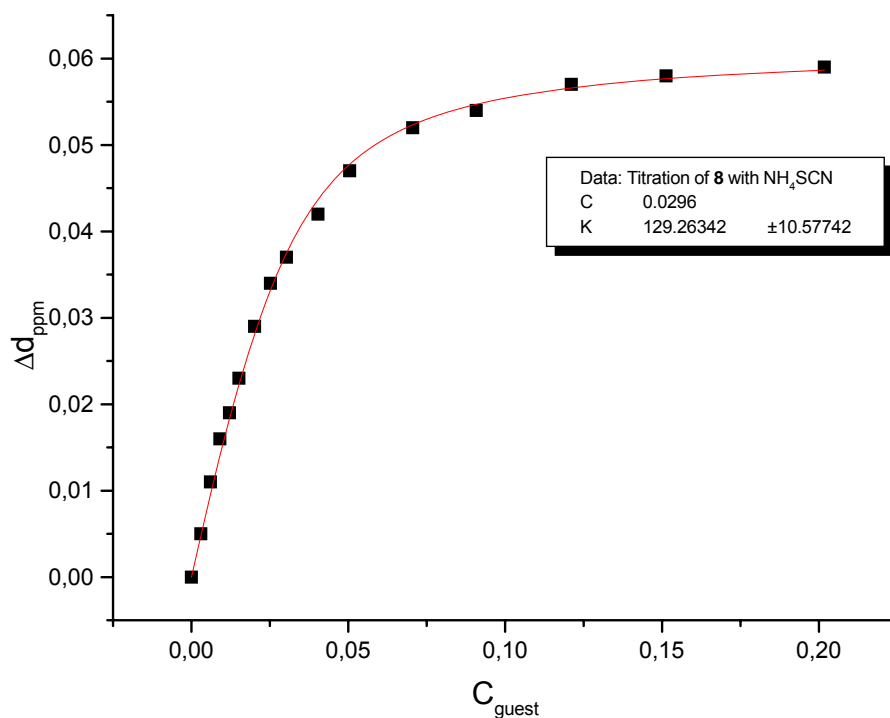

| Concentration of $\text{NH}_4\text{SCN}$<br>(M/L) | $\Delta d_{\text{ppm}}$ |
|---------------------------------------------------|-------------------------|
| 0                                                 | 0                       |
| 0.00303                                           | 0.005                   |
| 0.00605                                           | 0.011                   |
| 0.00908                                           | 0.016                   |
| 0.0121                                            | 0.019                   |
| 0.01513                                           | 0.023                   |
| 0.02017                                           | 0.029                   |
| 0.02522                                           | 0.034                   |
| 0.03026                                           | 0.037                   |
| 0.04035                                           | 0.042                   |
| 0.05044                                           | 0.047                   |
| 0.07061                                           | 0.052                   |
| 0.09079                                           | 0.054                   |
| 0.12105                                           | 0.057                   |
| 0.15132                                           | 0.058                   |
| 0.20175                                           | 0.059                   |

$$K_a = 129 \pm 10 \text{ M/L}$$

Complexation of **8** with S(-) phenylethylammonium chloride (CDCl<sub>3</sub>). Concentration of **8** in chloroform, C<sub>8</sub> = 0.021 M/L.

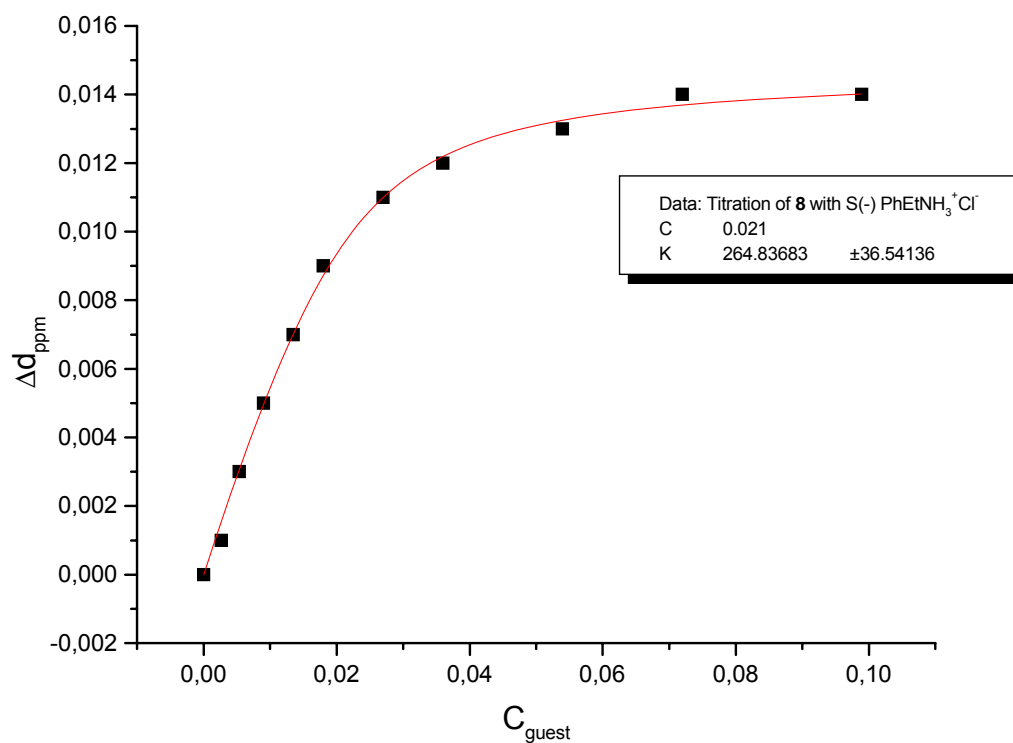

| Concentration of S(-)<br>PhEtNH <sub>3</sub> <sup>+</sup> Cl <sup>-</sup> (M/L) | Δd <sub>ppm</sub> |
|---------------------------------------------------------------------------------|-------------------|
| 0                                                                               | 0                 |
| 0.0027                                                                          | 0.001             |
| 0.0054                                                                          | 0.003             |
| 0.00899                                                                         | 0.005             |
| 0.01349                                                                         | 0.007             |
| 0.01799                                                                         | 0.009             |
| 0.02698                                                                         | 0.011             |
| 0.03598                                                                         | 0.012             |
| 0.05397                                                                         | 0.013             |
| 0.07196                                                                         | 0.014             |
| 0.09894                                                                         | 0.014             |

$$K_a = 264 \pm 36 \text{ M/L}$$

### Compound 4:

Complexation of **4** with S(-) phenylethylammonium chloride. Concentration of **4** in chloroform,  $C_4 = 0.021$  M/L.

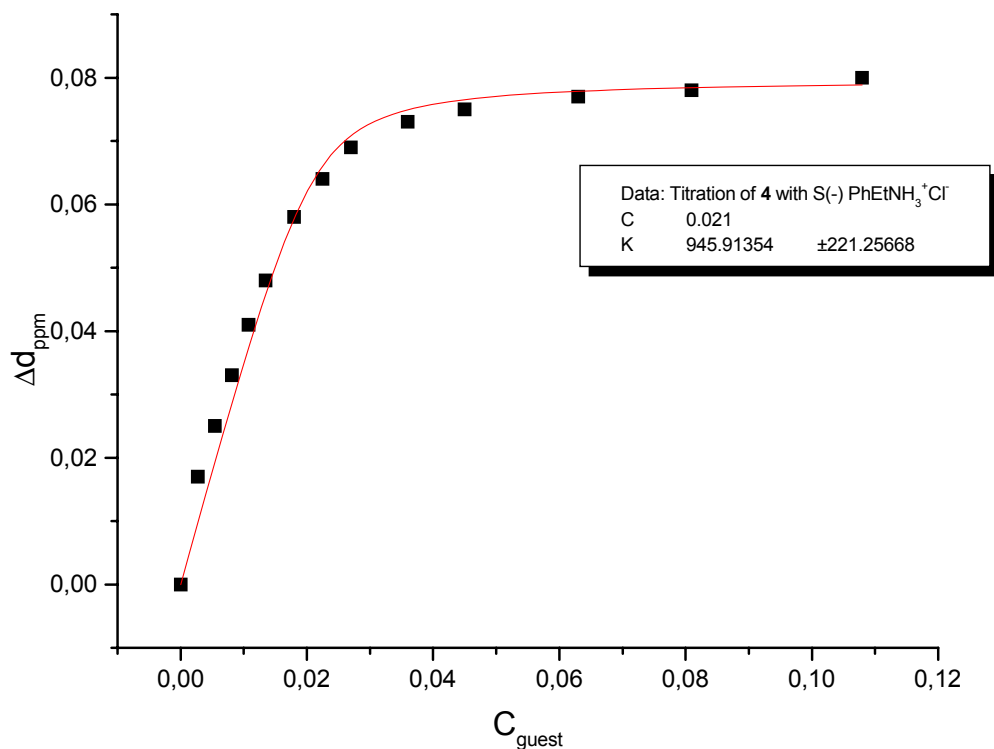

| Concentration of S(-) PhEtNH <sub>3</sub> <sup>+</sup> Cl <sup>-</sup> (M/L) | $\Delta d_{\text{ppm}}$ |
|------------------------------------------------------------------------------|-------------------------|
| 0                                                                            | 0                       |
| 0.0027                                                                       | 0.017                   |
| 0.0054                                                                       | 0.025                   |
| 0.00809                                                                      | 0.033                   |
| 0.01079                                                                      | 0.041                   |
| 0.01349                                                                      | 0.048                   |
| 0.01799                                                                      | 0.058                   |
| 0.02249                                                                      | 0.064                   |
| 0.02698                                                                      | 0.069                   |
| 0.03598                                                                      | 0.073                   |
| 0.04497                                                                      | 0.075                   |
| 0.06296                                                                      | 0.077                   |
| 0.08095                                                                      | 0.078                   |
| 0.10794                                                                      | 0.080                   |

$$K_a = 945 \pm 221 \text{ M/L}$$

Job plot for the interaction between **4** and S(-) PhEtNH<sub>3</sub><sup>+</sup>Cl<sup>-</sup>.

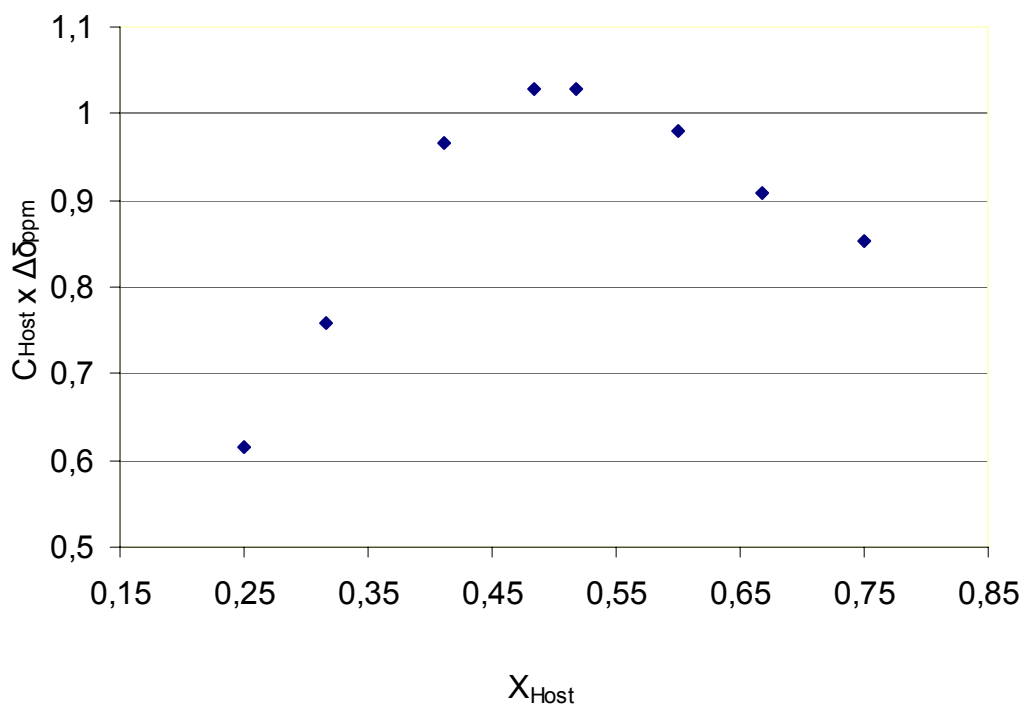



### Compound 3:

Complexation of **3** with S(-) phenylethylammonium chloride. Concentration of **3** in chloroform,  $C_3 = 0.0205$  M/L.

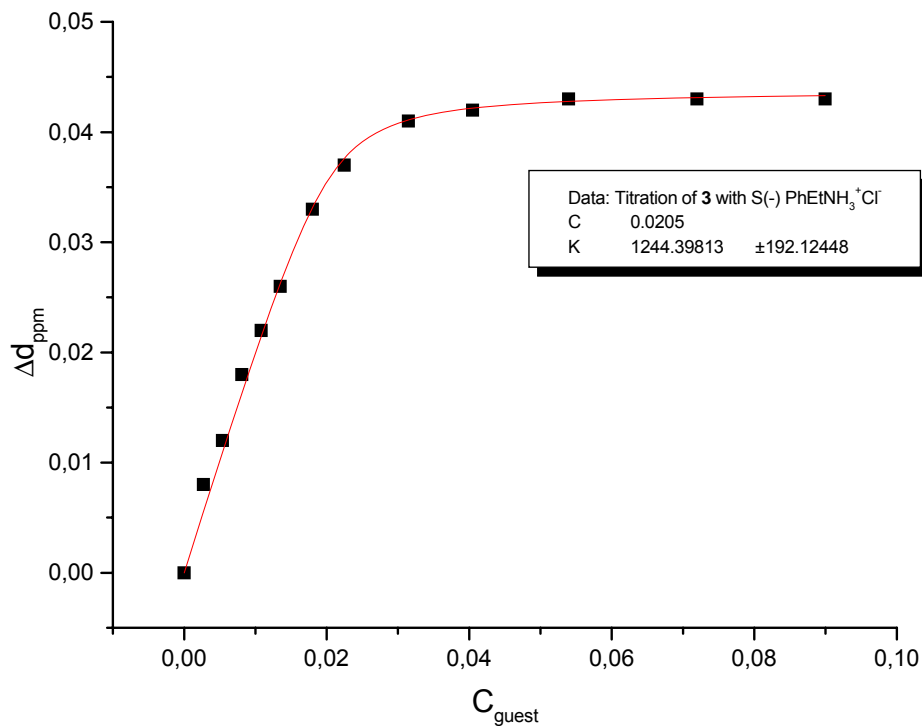

| Concentration of S(-)<br>PhEtNH <sub>3</sub> <sup>+</sup> Cl <sup>-</sup> (M/L) | $\Delta d_{\text{ppm}}$ |
|---------------------------------------------------------------------------------|-------------------------|
| 0                                                                               | 0                       |
| 0.0027                                                                          | 0.008                   |
| 0.0054                                                                          | 0.012                   |
| 0.00809                                                                         | 0.018                   |
| 0.01079                                                                         | 0.022                   |
| 0.01349                                                                         | 0.026                   |
| 0.01799                                                                         | 0.033                   |
| 0.02249                                                                         | 0.037                   |
| 0.03148                                                                         | 0.041                   |
| 0.04048                                                                         | 0.042                   |
| 0.05397                                                                         | 0.043                   |
| 0.07196                                                                         | 0.043                   |
| 0.08995                                                                         | 0.043                   |

$$K_a = 1244 \pm 192 \text{ M/L}$$

Complexation of **3** with R(+) phenylethylammonium chloride. Concentration of **3** in chloroform,  $C_3 = 0.0205$  M/L.

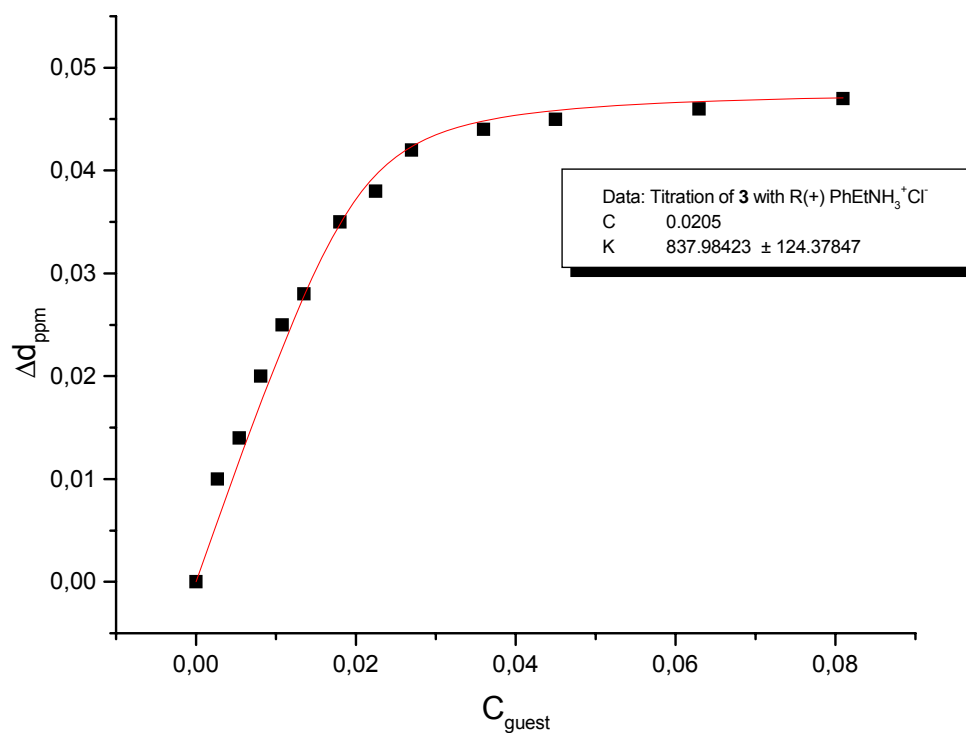

| Concentration of R(+)<br>PhEtNH <sub>3</sub> <sup>+</sup> Cl <sup>-</sup> (M/L) | $\Delta d_{\text{ppm}}$ |
|---------------------------------------------------------------------------------|-------------------------|
| 0                                                                               | 0                       |
| 0.0027                                                                          | 0.010                   |
| 0.0054                                                                          | 0.014                   |
| 0.00809                                                                         | 0.020                   |
| 0.01079                                                                         | 0.025                   |
| 0.01349                                                                         | 0.028                   |
| 0.01799                                                                         | 0.035                   |
| 0.02249                                                                         | 0.038                   |
| 0.02698                                                                         | 0.042                   |
| 0.03598                                                                         | 0.044                   |
| 0.04497                                                                         | 0.045                   |
| 0.06296                                                                         | 0.046                   |
| 0.08095                                                                         | 0.047                   |

$$K_a = 837 \pm 124 \text{ M/L}$$
